# Supplementary material for: Nutrient stoichiometry in winter wheat: Element concentration pattern reflects developmental stage and weather
Source: PubMed Central journal article supplement (PMC5075900; doi:10.1038/srep35958), 2016-10-24
Supplement: srep35958-s1.pdf [file srep35958-s1.pdf]

## Scientific Reports Supporting Information

Article title: **Nutrient stoichiometry in winter wheat: Element concentration pattern reflects developmental stage and weather**

Authors: M. Weih, F. Pourazari, G. Vico

The following Supporting Information is available for this article:

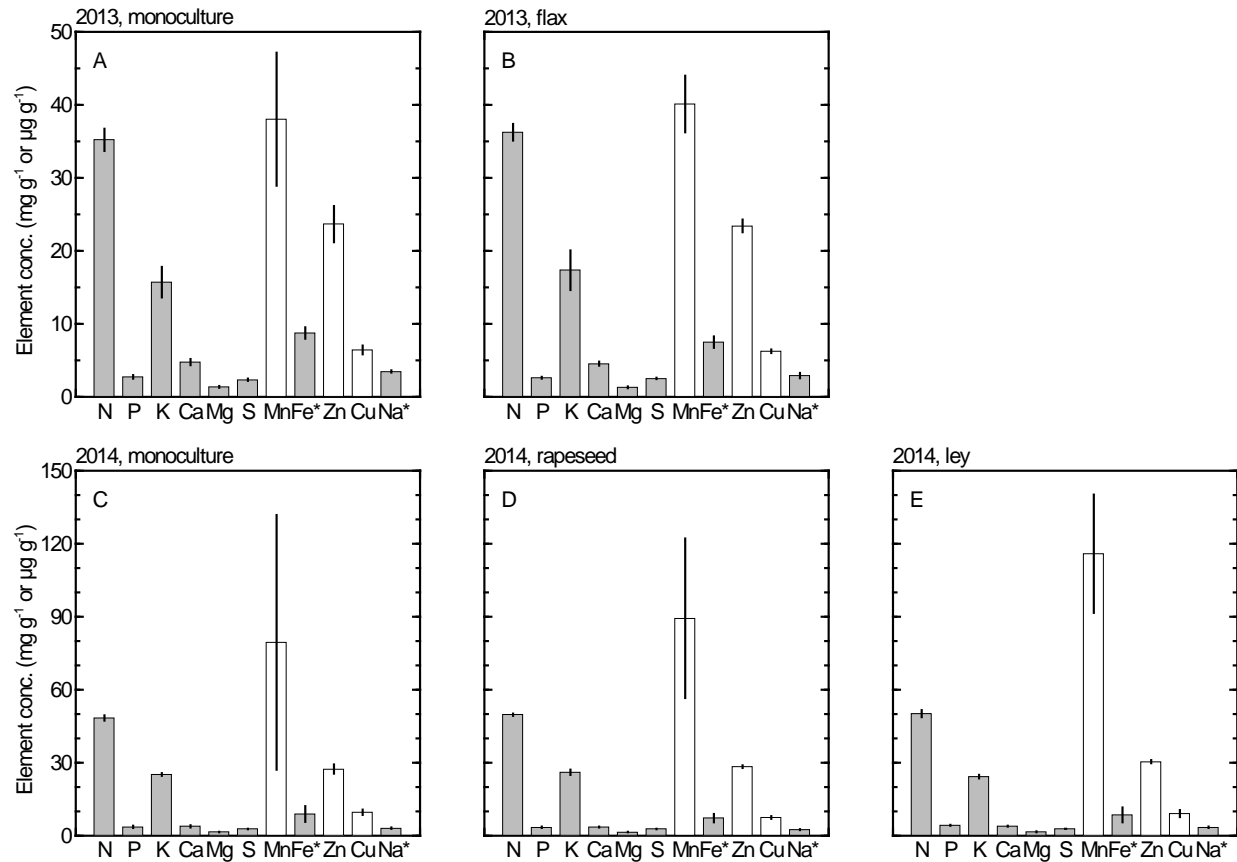

**Figure S1.** Means (bars) and standard deviations (whiskers) of element concentrations in **above ground biomass** of winter wheat at **BBCH 31** (start of stem elongation in spring) grown in monoculture and with various preceding crops (flax, rape, ley) in 2013 (A, B) and 2014 (C to E) in a long-term field experiment (Säby R4-0009) in Central Sweden. Units are mg g<sup>-1</sup> (closed bars) for most of the elements except Mn, Zn and Cu, for which the unit is µg g<sup>-1</sup> (open bars); \* for Fe and Na means mg g<sup>-1</sup> x 10. Note the difference in the y-axis scale between top and bottom rows.

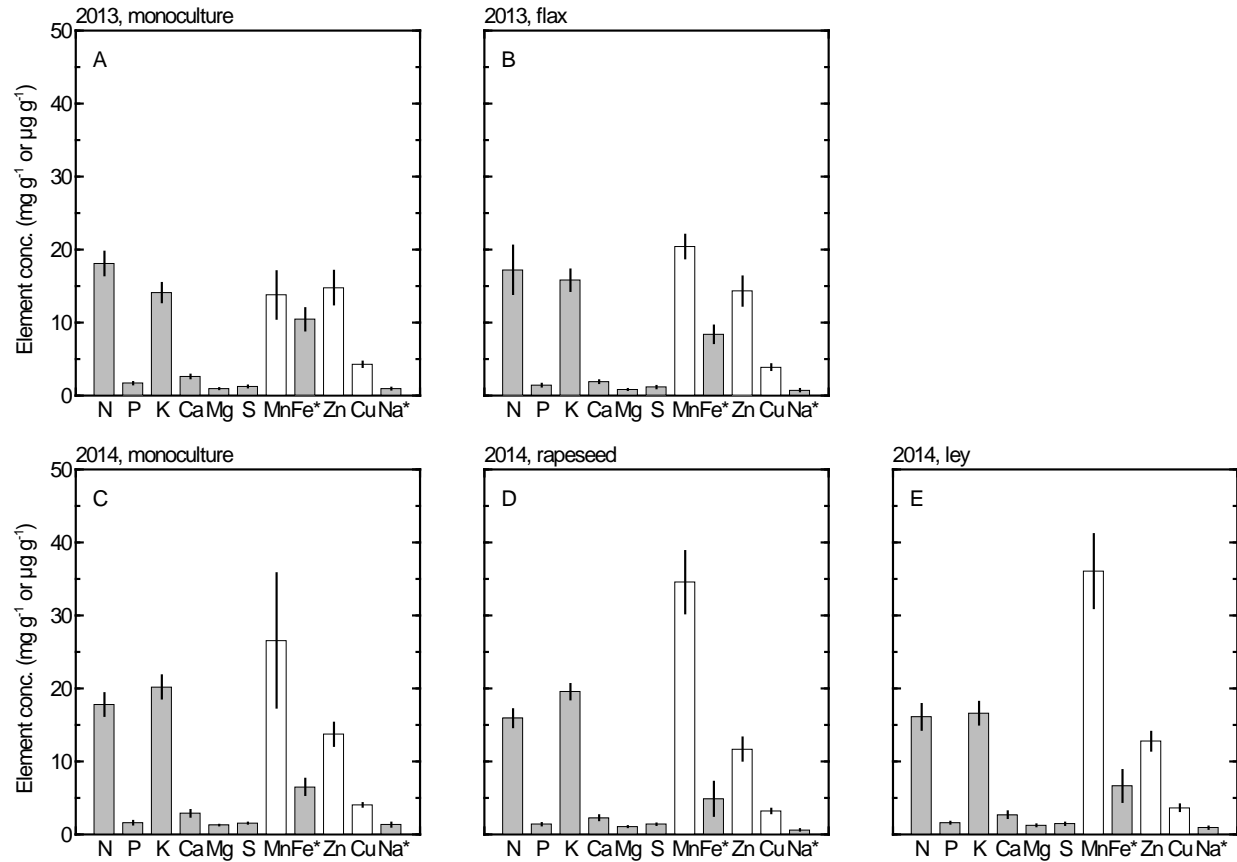

**Figure S2.** Means (bars) and standard deviations (whiskers) of element concentrations in **above ground biomass** of winter wheat at **BBCH 61** (anthesis) grown in monoculture and with various preceding crops (flax, rape, ley) in 2013 (A, B) and 2014 (C to E) in a long-term field experiment (Säby R4-0009) in Central Sweden. Units are mg g<sup>-1</sup> (closed bars) for most of the elements except Mn, Zn and Cu, for which the unit is μg g<sup>-1</sup>(open bars); \* for Fe and Na means mg g<sup>-1</sup> x 10.

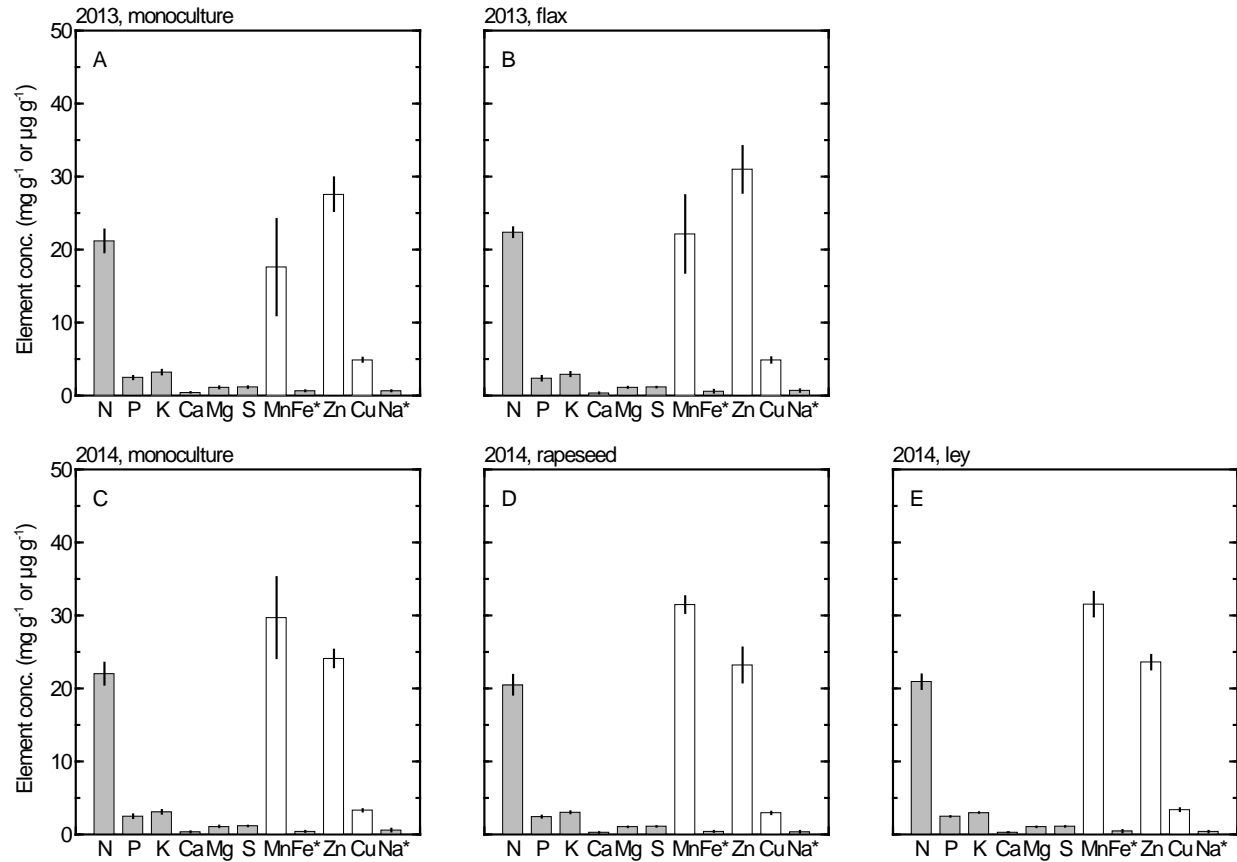

**Figure S3.** Means (bars) and standard deviations (whiskers) of element concentrations in **grain** yield of winter wheat grown in monoculture and with various preceding crops (flax, rape, ley) in 2013 (A, B) and 2014 (C to E) in a long-term field experiment (Säby R4-0009) in Central Sweden. Units are mg g<sup>-1</sup> (closed bars) for most of the elements except Mn, Zn and Cu, for which the unit is µg g<sup>-1</sup> (open bars); \* for Fe and Na means mg g<sup>-1</sup> x 10.
